# Supplementary material
Source: MDPI journal article supplement (https://www.mdpi.com/2071-1050/10/9/3234)
Supplement: s1 [file s1]

**Supplementary Material:**
**Table S1.** Summary of the crop management activities up to harvesting of the maize.

| Activities/Years | Land preparation                                                          | Seed sowing | Earthing-up | Irrigation                                                 | Pests management                                                                                                                                                                | Harvesting  |
|------------------|---------------------------------------------------------------------------|-------------|-------------|------------------------------------------------------------|---------------------------------------------------------------------------------------------------------------------------------------------------------------------------------|-------------|
| 2009–2010        | As per treatments. The plots were treated by spraying Round-up herbicide. | 27/12/ 2009 | 30 DAS      | 5 (Five) irrigations were done at 1, 20, 30, 63 and 88 DAS | Malathion60 EC (1 cc. in 1 liter water) was sprayed on the infested plants for leaf roller and leaf hopper insects, 10% Sevin dust at 10 kg/ha in the form of ring for cutworm. | 29 May 2010 |
| 2010–2011        | Same as above.<br>The plots were treated by spraying Refit50EC herbicide. | 25/12/ 2010 | 30 DAS      | 5 (five) irrigations were done at 1, 20,30, 65 and 85 DAS  | Only Malathion 60 EC (1 cc. in 1 liter water) and on the infested plants was sprayed for leaf roller and leaf hopper insects                                                    | 27 May 2011 |
| 2011–2012        | Same as above. The plots were treated by spraying Refit50EC herbicide.    | 27/12/2011  | 30 DAS      | 5 (five) irrigations were done at 1, 19,30, 65and 84 DAS   | Malathion60 EC (1 cc. in 1 liter water) was sprayed on the infested plants for leaf roller and leaf hopper insects, 10% Sevin dust at 10 kg/ha in the form of ring for cutworm. | 26 May 2012 |
